# Supplementary material
Source: PubMed Central journal article supplement (PMC5587854)
Supplement: cr201786x1.pdf [file cr201786x1.pdf]

**A**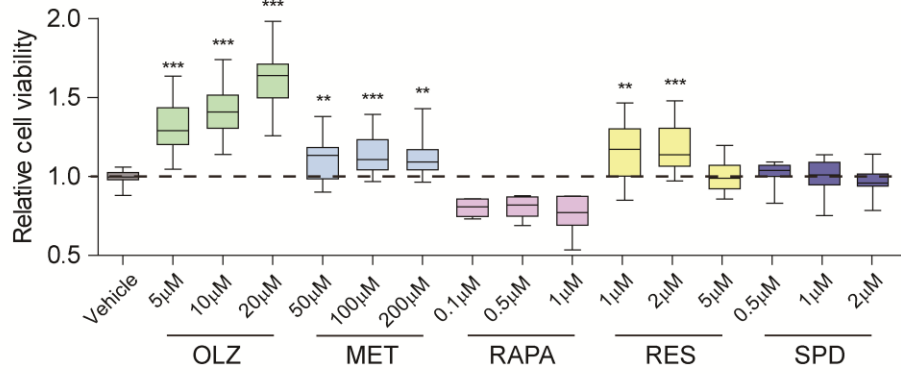**B**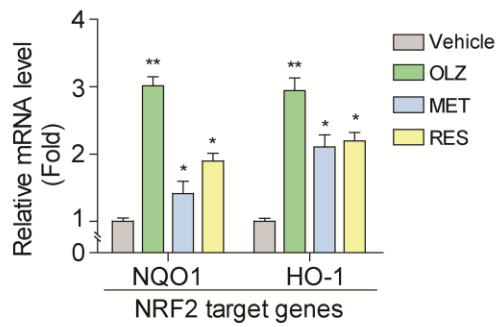**C**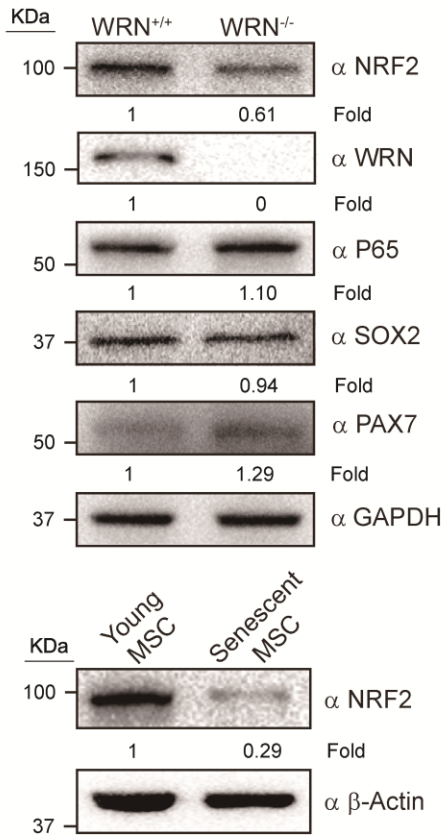

**Supplementary information, Figure S1. Gero-protective chemicals screen to identify candidates capable of alleviating senescence**

(A) Clonally plated pre-senescent WS hMSCs (one passage prior to MSC senescence, P4) were treated with chemicals for over 2 weeks and cell viability was evaluated by MTS assay. Data were normalized to the vehicle control group (Vehicle). Plot was presented as Whiskers (Min to Max), n = 18, \*\*P < 0.01, \*\*\*P < 0.001. Gero-protective chemicals were as follows: Oltipraz (OLZ), Metformin (MET), Rapamycin (RAPA), Resveratrol (RES) and Spermidine (SPD).

(B) RT-qPCR analysis of NRF2 target genes (*NQO1* and *HO-1*) in wild-type hMSCs (P2) with or without OLZ (10  $\mu$ M), MET (100  $\mu$ M) and RES (1  $\mu$ M) treatments. Data were presented as mean  $\pm$ SEM, n = 3, one-tail test, \*P<0.05, \*\*P < 0.01.

(C) Western blot analysis of NRF2 and other transcriptional factors in WS and in replicative senescent hMSCs. GAPDH and  $\beta$ -Actin were used as loading controls.

A

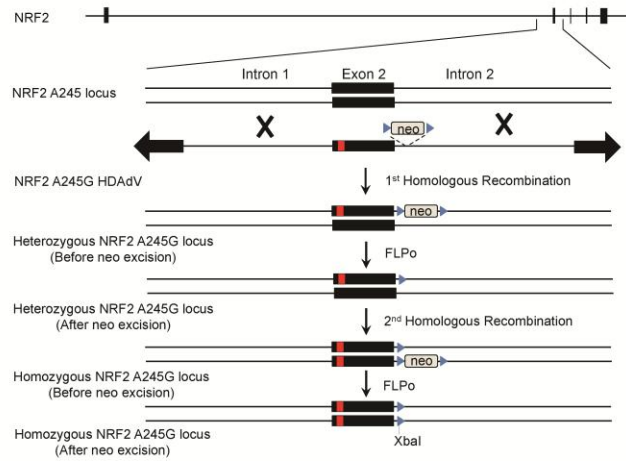

B

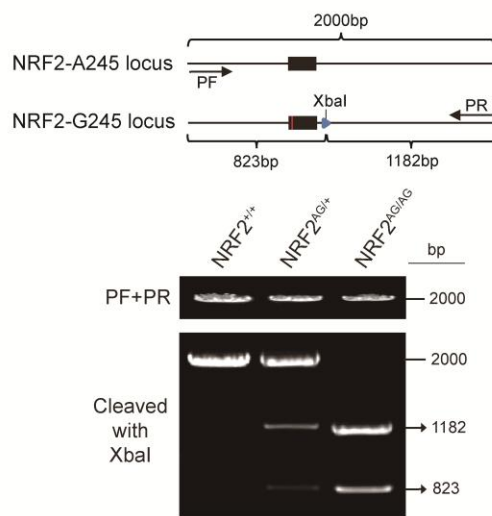

C

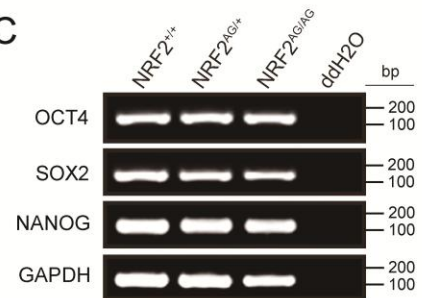

D

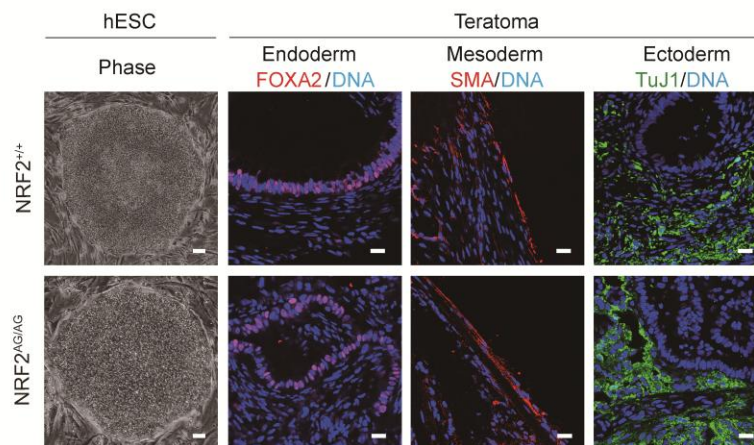

**Supplementary information, Figure S2. Generation of *NRF2*-A245G knock-in hESCs**

(A) Schematic demonstration of *NRF2* gene editing strategy using *NRF2*-A245G-HDAV. The point variation (A245G) in the *NRF2* locus results in a glutamic acid to glycine switch at amino acid 82 of the NRF2 protein and is supposed to lead to NRF2 stabilization and transcriptional activation of its target genes. Blue triangle, FRT site; Red stripe, A245G.

(B) Schematic diagram of restriction fragment length polymorphism (RFLP) identification in *NRF2*-A245 locus. Blue triangle, FRT site; Red stripe, A245G. Purified PCR products of *NRF2*-A245 locus in genomic DNAs of hESCs (top) were cleaved with XbaI (bottom) to verify successful homologous recombination.

(C) RT-PCR analysis of the pluripotency markers OCT4, SOX2, and NANOG in *NRF2*<sup>+/+</sup> and *NRF2*<sup>AG/AG</sup> hESCs. GAPDH, loading control.

(D) Representative bright-field (left) and immunofluorescence (right) images showing morphology of hESCs and expression of marker genes from the three germ layers in teratomas derived from hESCs, respectively. Scale bar, 100  $\mu$ m (Phase), 20  $\mu$ m (Ectoderm, Mesoderm and Endoderm).

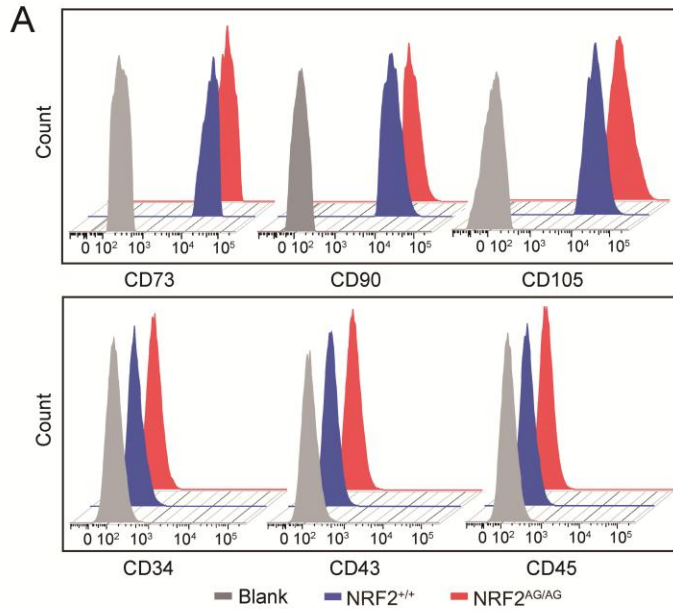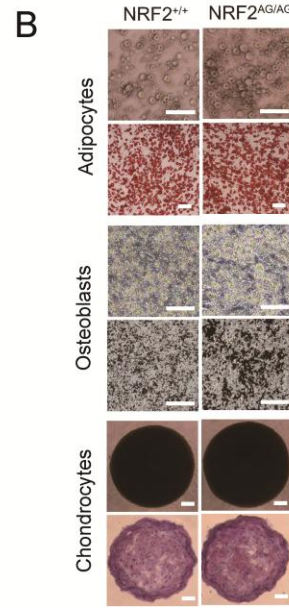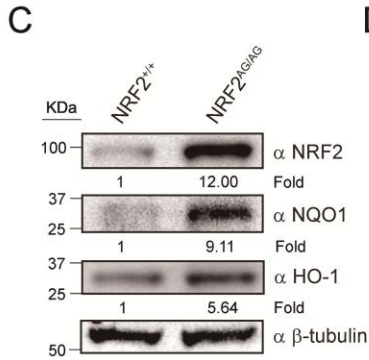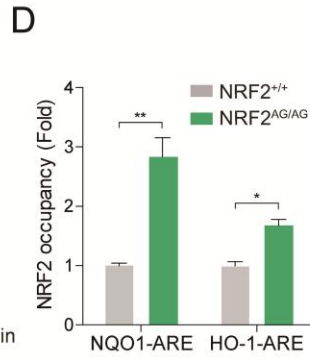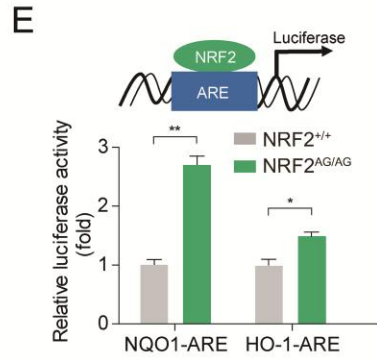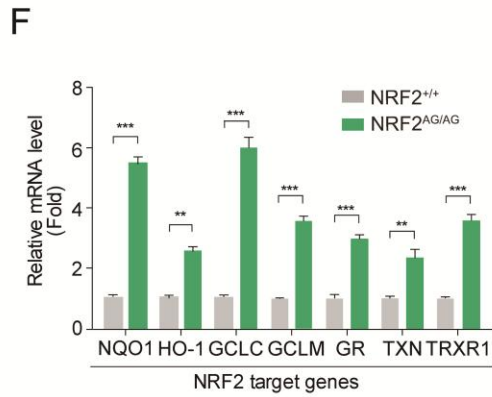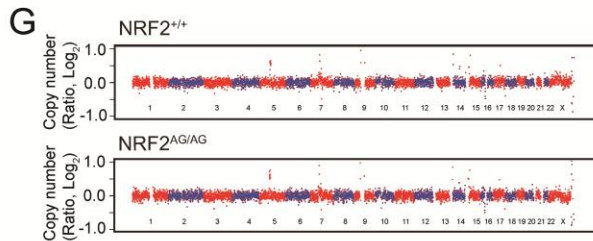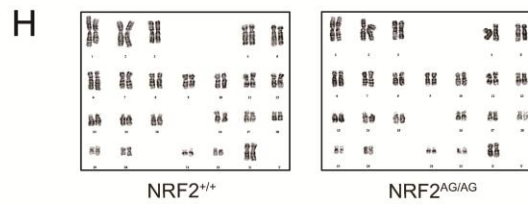

**Supplementary information, Figure S3. Characterization of *NRF2*<sup>AG/AG</sup> hMSC**

(A) Flow cytometric analysis of MSC-specific surface markers (CD73, CD90 and CD105) and MSC-irrelevant markers (CD34, CD43 and CD45) in *NRF2*<sup>+/+</sup> and *NRF2*<sup>AG/AG</sup> hMSCs.

(B) Characterization of multiple-lineage differentiation potential of hMSCs. Oil Red O, Von Kossa and Toluidine blue O staining were used to evaluate adipogenesis, osteogenesis and chondrogenesis potential of MSCs, respectively. Bright field (upper); stained (lower). Scale bar, 100  $\mu$ m.

(C) Western blot analysis of NRF2 and its target genes *NQO1* and *HO-1* in *NRF2*<sup>+/+</sup> and *NRF2*<sup>AG/AG</sup> hMSCs (P2).  $\beta$ -tubulin, loading control.

(D) ChIP-qPCR analysis of the enrichment of NRF2 at the cis-regulatory elements of *NQO1* and *HO-1* genes (NQO1-ARE and HO-1-ARE, respectively) in hMSCs (P2). Data were presented as mean  $\pm$  SEM, n = 3, \*P < 0.05, \*\*P < 0.01.

(E) The transcriptional activity of endogenous NRF2 was measured by ARE-driven luciferase reporter assay. *NRF2*<sup>+/+</sup> and *NRF2*<sup>AG/AG</sup> hMSCs (P2) were co-transfected with NQO1/HO-1-ARE-luciferase and Renilla plasmids. Data were presented as mean  $\pm$  SEM, n = 5, \*P < 0.05, \*\*P < 0.01.

(F) RT-qPCR analysis of NRF2 target genes in hMSCs (P2). Data were presented as mean  $\pm$  SEM, n = 3, \*\*P < 0.01, \*\*\*P < 0.001.

(G) Whole genome sequencing analysis of copy number variations (CNVs) in hMSCs (P5).

(H) G-banded karyotyping analysis of *NRF2*<sup>+/+</sup> and *NRF2*<sup>AG/AG</sup> hMSCs (P5).

**A**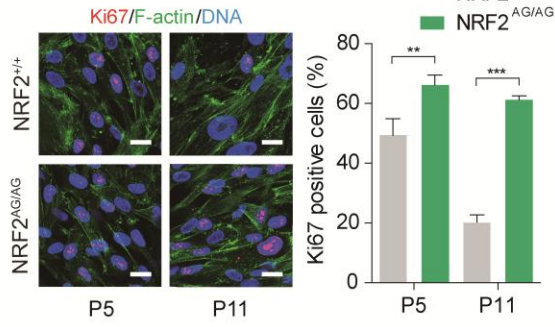**B**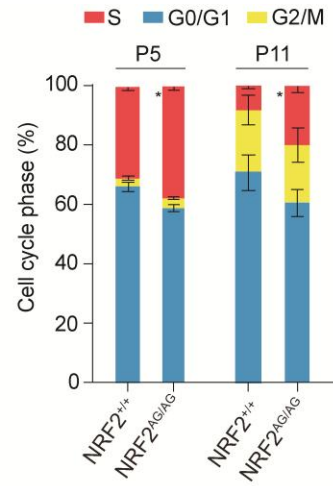**C**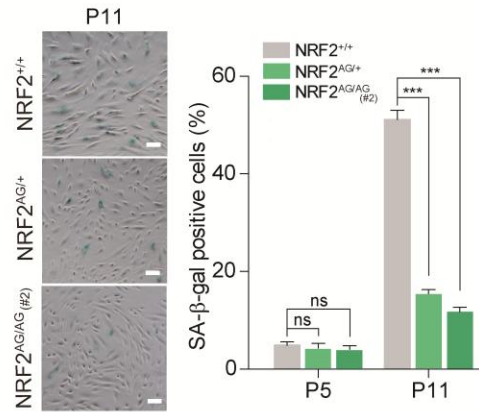**D**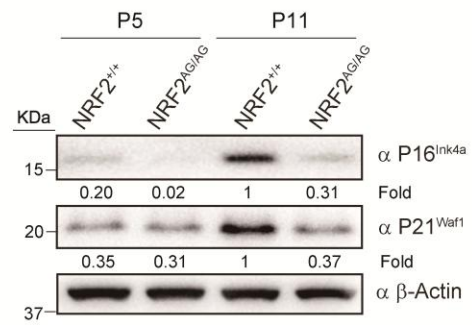**E**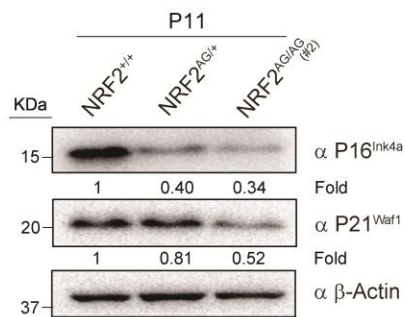**F**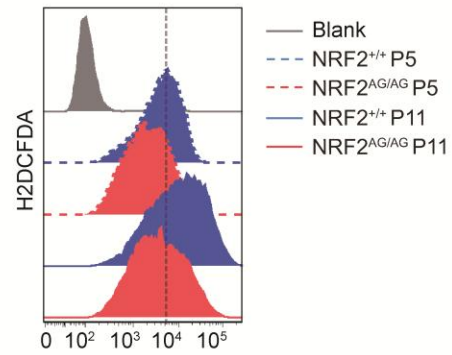**G**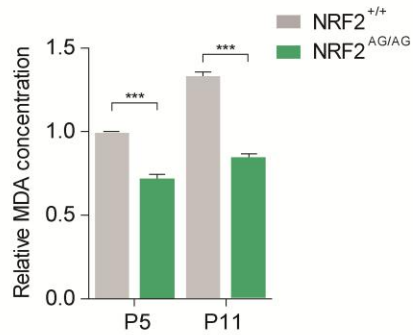**H**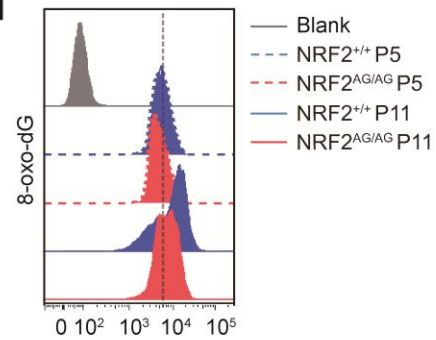

**Supplementary information, Figure S4. Activating the NRF2 pathway confers cellular senescence- resistance to cultured hMSCs**

(A-B) *NRF2*<sup>AG/AG</sup> hMSCs maintained a cell cycle profile characteristic of proliferating cells from P5 to P11. (A) Ki67 immunostaining analysis of *NRF2*<sup>+/+</sup> and *NRF2*<sup>AG/AG</sup> hMSCs at P5 and P11. Scale bar, 20  $\mu$ m. Data were presented as mean  $\pm$  SEM, n = 6, \*\*P < 0.01, \*\*\*P < 0.001. (B) Cell cycle analysis of *NRF2*<sup>+/+</sup> and *NRF2*<sup>AG/AG</sup> hMSCs at P5 and P11. Data were presented as Mean  $\pm$  SEM, n = 3, Statistical significance of cell percentage in S phase were compared between *NRF2*<sup>+/+</sup> and *NRF2*<sup>AG/AG</sup> hMSCs, \*P < 0.05.

(C) SA- $\beta$ -gal staining of *NRF2*<sup>+/+</sup>, *NRF2*<sup>AG/+</sup> and *NRF2*<sup>AG/AG</sup>(#2) hMSCs at P5 and P11. Scale bar, 50  $\mu$ m. Data were presented as mean  $\pm$  SEM, n = 8, ns: not significant, \*\*\*P < 0.001.

(D) Western blot analysis of P16<sup>Ink4a</sup> and P21<sup>waf1</sup> proteins in P5 and P11 hMSCs.  $\beta$ -Actin, loading control.

(E) Western blot analysis of aging-associated P16<sup>Ink4a</sup> and P21<sup>waf1</sup> protein in *NRF2*<sup>+/+</sup>, *NRF2*<sup>AG/+</sup> and *NRF2*<sup>AG/AG</sup>(#2) hMSCs (P11).  $\beta$ -Actin, loading control.

(F) Detection of cellular reactive oxygen species (ROS) levels in hMSCs with H2DCFDA probes.

(G) Detection of a lipid oxidation product malondialdehyde (MDA) in *NRF2*<sup>+/+</sup> and *NRF2*<sup>AG/AG</sup> hMSCs at P5 and P11. Data were normalized to cell numbers, n = 3, \*\*\*P < 0.001.

(H) Flow cytometric analysis of DNA oxidation indicator 8-oxo-7, 8-dihydro-2'-deoxyguanosine (8-oxo-dG) levels in hMSCs at P5 and P11.



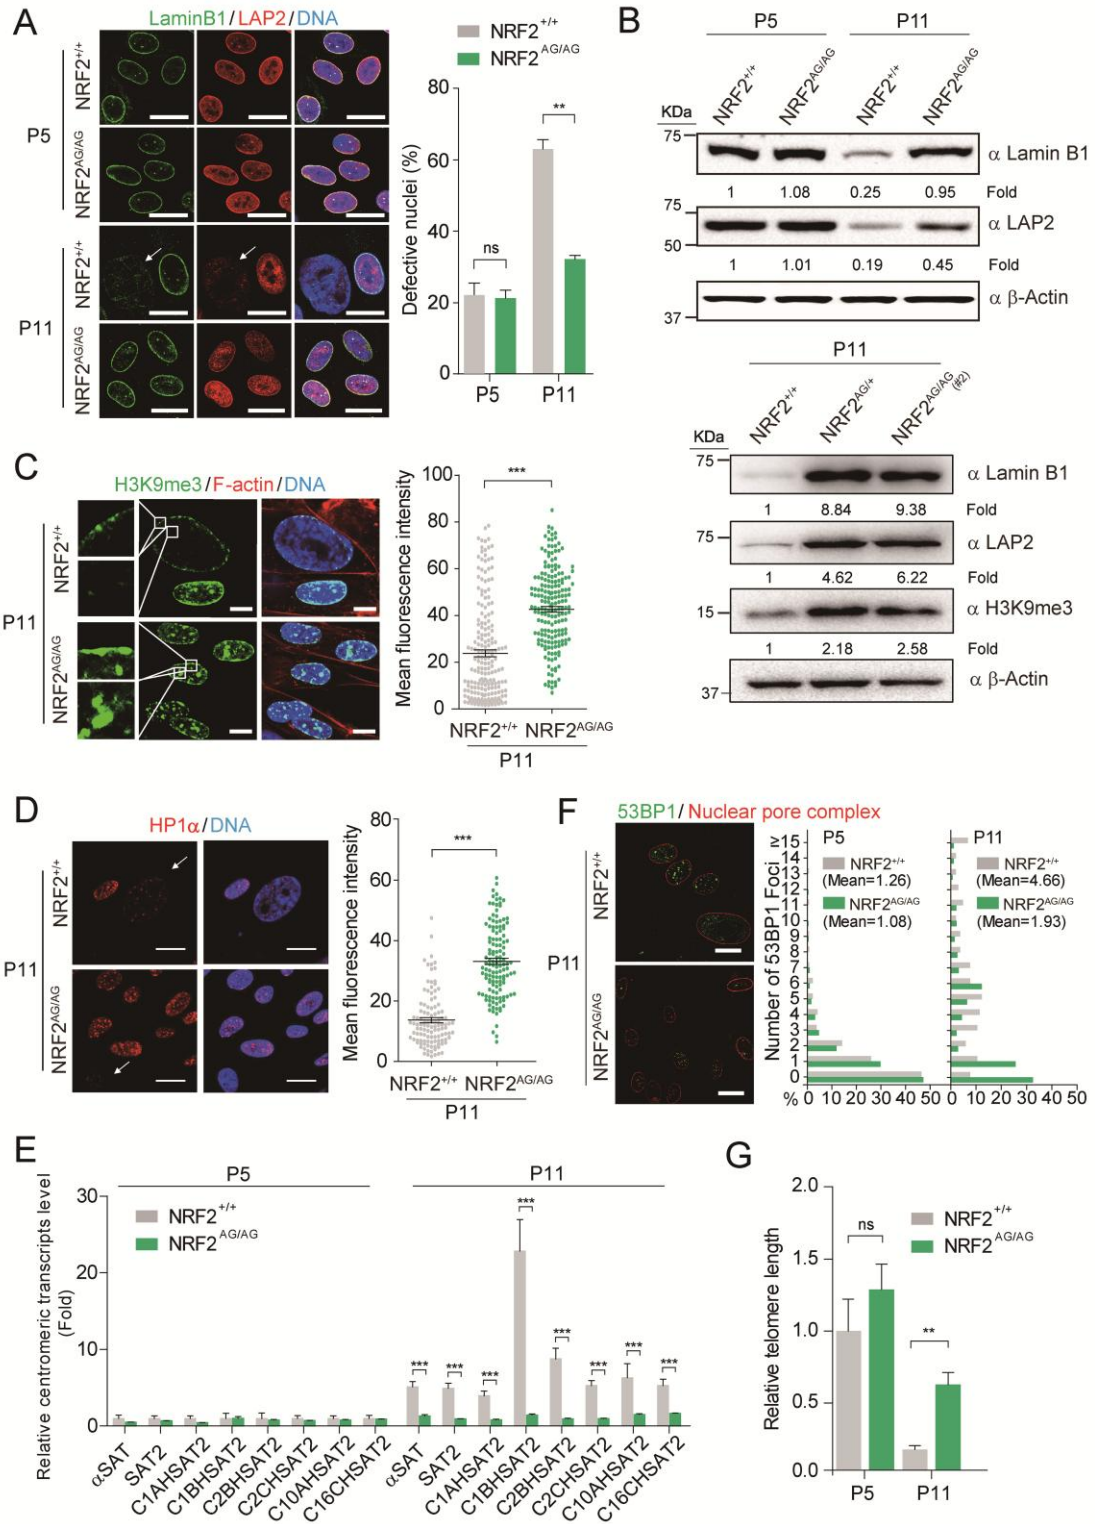

**Supplementary information, Figure S5. *NRF2*<sup>AG/AG</sup> hMSCs repressed senescence-associated defects in nuclear envelope and (epi-)genome**

(A-B) *NRF2*<sup>AG/AG</sup> hMSCs were resistant to aging-associated NE defects. (A) Immunofluorescence analysis of Lamin B1 and LAP2 expression in hMSCs. White arrows denote the nuclear envelope-defective cells with decreased Lamin B1 and LAP2 expression. Scale bar, 20  $\mu$ m. Data were presented as mean  $\pm$  SEM, n = 8, ns: not significant, \*\*\*P < 0.001. (B) Western blot analysis of Lamin B1 and LAP2 protein in hMSCs.  $\beta$ -Actin, loading control.

(C-E) *NRF2*<sup>AG/AG</sup> hMSCs were resistant to aging-associated epigenetic alteration. Representative immunofluorescence images of heterochromatin marks H3K9me3 (C) and HP1 $\alpha$  (D) in *NRF2*<sup>+/+</sup> and *NRF2*<sup>AG/AG</sup> hMSCs at P11. Scale bar, 10  $\mu$ m. White arrows denote cells with decreased HP1 $\alpha$  expression. Mean fluorescence intensities of H3K9m3 and HP1 $\alpha$  were measured by ImageJ. Data were presented as mean  $\pm$  SEM. >100 nuclei from 10 images were scored, \*\*\*P < 0.001. (E) RT-qPCR analysis of the centromeric satellite DNA transcripts in *NRF2*<sup>+/+</sup> and *NRF2*<sup>AG/AG</sup> hMSCs. Consistent with the loss of heterochromatin marks, the overrepresentation of transcripts from centromeric satellite DNA normally seen in *NRF2*<sup>+/+</sup> hMSCs undergoing replicative senescence was not observed in *NRF2*<sup>AG/AG</sup> hMSCs at P11. Data were presented as mean  $\pm$  SEM, n=3, \*\*\*P < 0.001.

(F-G) *NRF2*<sup>AG/AG</sup> hMSCs were resistant to aging-associated accumulation of genome damage. (F) The number of 53BP1 foci per nucleus in the nuclei of *NRF2*<sup>+/+</sup> and *NRF2*<sup>AG/AG</sup> hMSCs at P5 and P11 was quantified. *NRF2*<sup>AG/AG</sup> hMSCs exhibited less accumulation of nuclear 53BP1 foci. >200 nuclei from 10 images were scored. Scale bar, 20  $\mu$ m. (G) Quantitative RT-PCR analysis of relative telomere length showing milder telomere attrition in *NRF2*<sup>AG/AG</sup> hMSCs. Data were normalized to the value of P5 *NRF2*<sup>+/+</sup> group and presented as mean  $\pm$  SEM, n=5, ns: not significant, \*\*P < 0.01.

**A**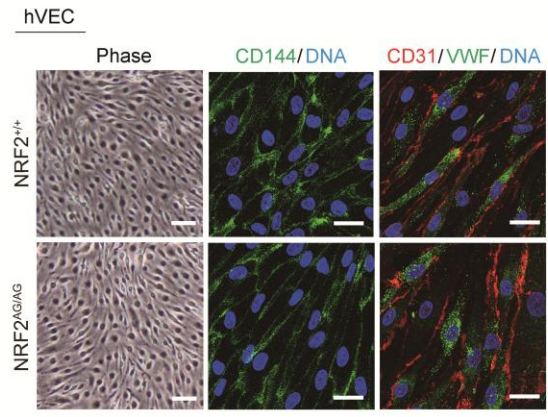**B**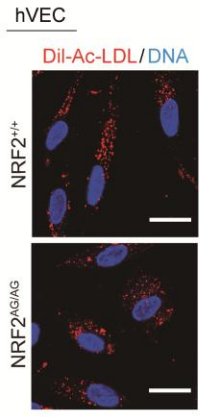**C**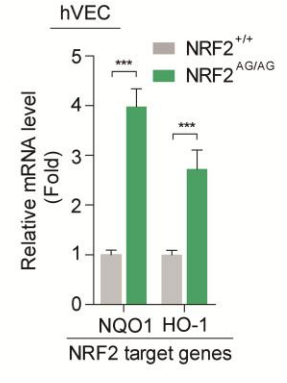**D**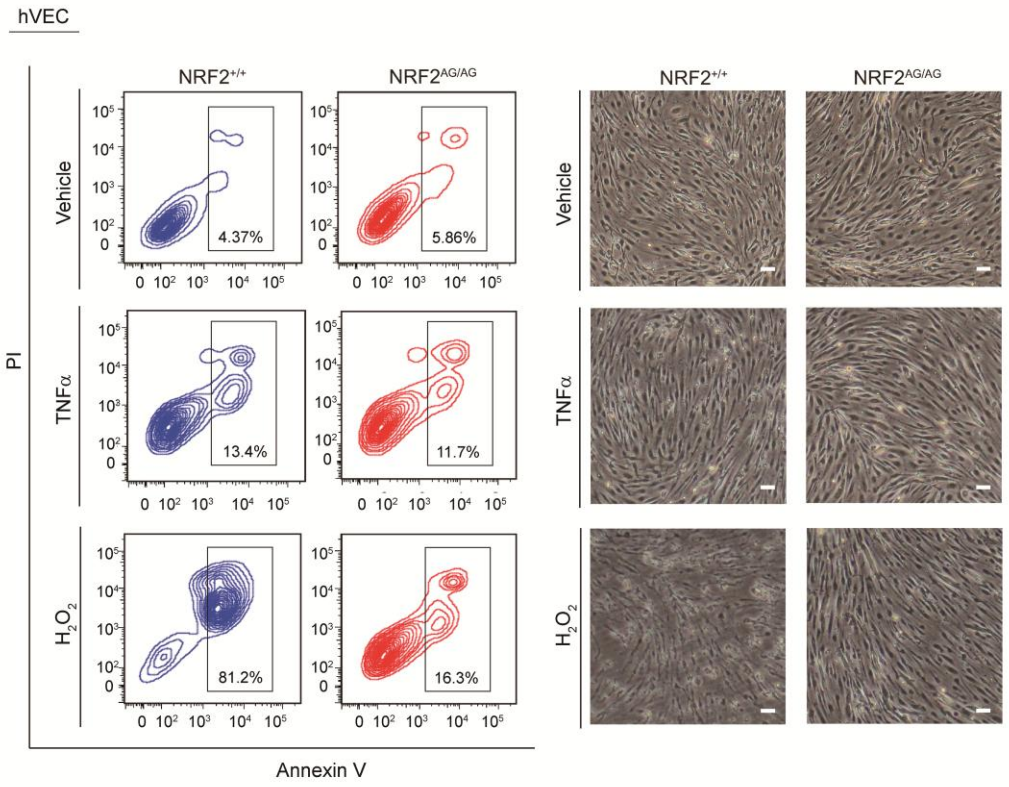

**Supplementary information, Figure S6. *NRF2*<sup>AG/AG</sup> hVECs exhibited resistance to oxidative stress**

(A) Representative bright-field (left) and immunofluorescence (right) images showing morphology of hVECs and expression of endothelial cell-specific markers CD144, CD31 and VWF in *NRF2*<sup>+/+</sup> and *NRF2*<sup>AG/AG</sup> hVECs. Scale bar, 200  $\mu$ m (Phase), 50  $\mu$ m (immunofluorescence images).

(B) The uptake of Dil-Ac-LDL (dioctadecylindocarbocyanine-labeled acetylated low-density lipoprotein) in *NRF2*<sup>+/+</sup> and *NRF2*<sup>AG/AG</sup> hVECs. Scale bar, 25  $\mu$ m.

(C) RT-qPCR analysis confirmed that the NRF2 was activated in *NRF2*<sup>AG/AG</sup> hVECs. Data were presented as mean  $\pm$  SEM, n = 3, \*\*\*P < 0.001.

(D) *NRF2*<sup>+/+</sup> and *NRF2*<sup>AG/AG</sup> hVECs were treated with 10 ng/mL TNF $\alpha$  or 500  $\mu$ M H<sub>2</sub>O<sub>2</sub> for 24 h, and the apoptotic cells were determined by Annexin V-PI staining via flow cytometric analysis. Specifically, *NRF2*<sup>AG/AG</sup> hVECs exhibited resistance to H<sub>2</sub>O<sub>2</sub>-induced apoptosis.

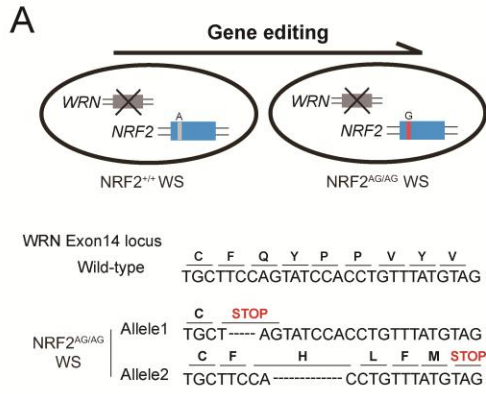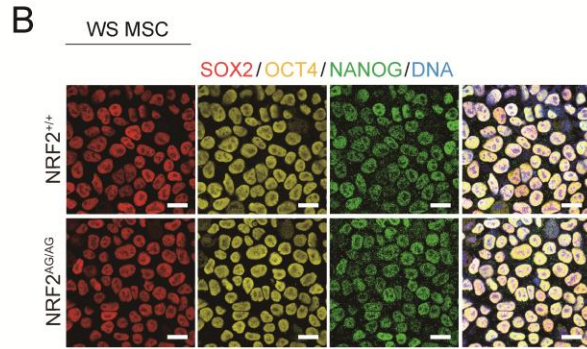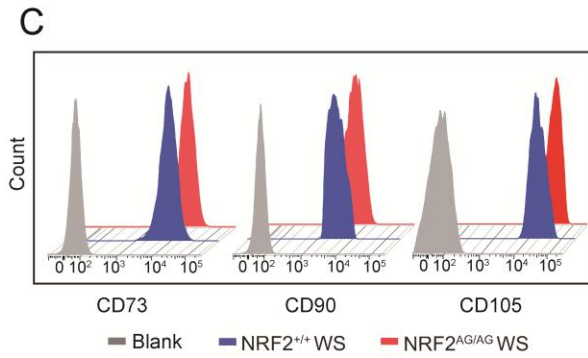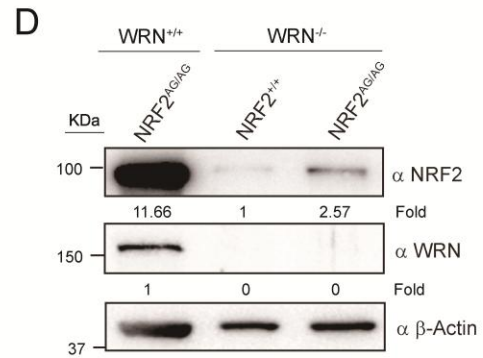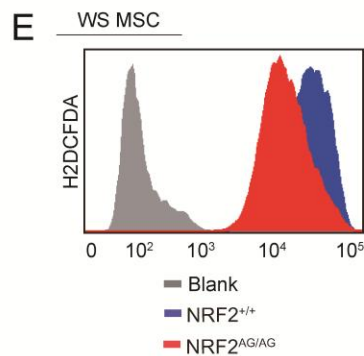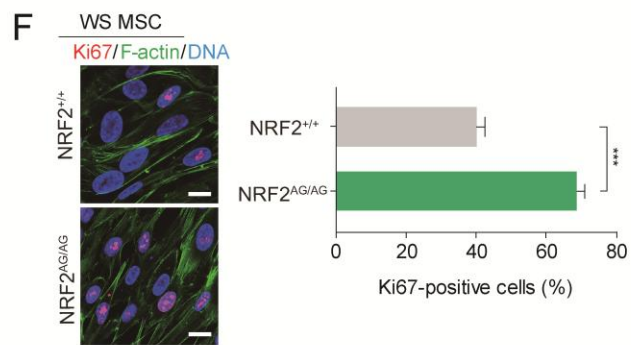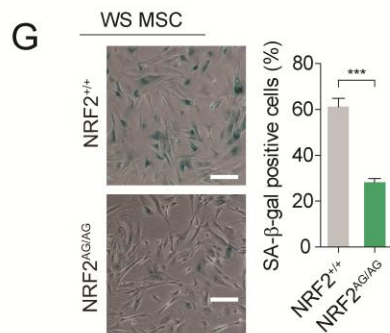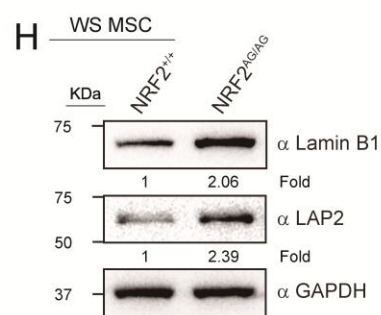

**Supplementary information, Figure S7. Genetic modification of *NRF2* relieved the premature senescence in a WS background**

(A) Schematic diagram showing the strategy of genetic modification in hESCs to generate the *NRF2*-A245G knock-in WS hESCs. Genotyping result was shown at the bottom.

(B) Immunofluorescence analysis of pluripotency marker gene expressions in *NRF2*<sup>+/+</sup> and *NRF2*<sup>AG/AG</sup> WS hESCs. Scale bar, 20  $\mu$ m.

(C) Flow cytometric analysis of MSC-specific surface markers CD73, CD90, and CD105 in *NRF2*<sup>+/+</sup> and *NRF2*<sup>AG/AG</sup> WS hMSCs.

(D) Western blot analysis of NRF2 and WRN proteins in *NRF2*<sup>+/+</sup> and *NRF2*<sup>AG/AG</sup> WS hMSCs.  $\beta$ -Actin, loading control.

(E) Constitutive activation of NRF2 repressed ROS contents in *NRF2*<sup>AG/AG</sup> WS hMSCs.

(F-H) Genetic enhancement of NRF2 in WS hMSCs alleviated accelerated aging phenotypes (i.e., reduced proliferation capacity, increase in SA- $\beta$ -gal positive cells, and diminished expression of nuclear envelope-associated proteins). (F) Ki67 immunostaining analysis of *NRF2*<sup>+/+</sup> and *NRF2*<sup>AG/AG</sup> WS hMSCs. Scale bar, 20  $\mu$ m. Data were presented as mean  $\pm$  SEM, n = 6, \*\*\*P < 0.001. (G) SA- $\beta$ -gal staining of *NRF2*<sup>+/+</sup> and *NRF2*<sup>AG/AG</sup> WS hMSCs. Scale bar, 50  $\mu$ m. Data were presented as mean  $\pm$  SEM, n = 6, \*\*\*P < 0.001. (H) Western blot analysis of Lamin B1 and LAP2 proteins in *NRF2*<sup>+/+</sup> and *NRF2*<sup>AG/AG</sup> WS hMSCs. GAPDH, loading control.



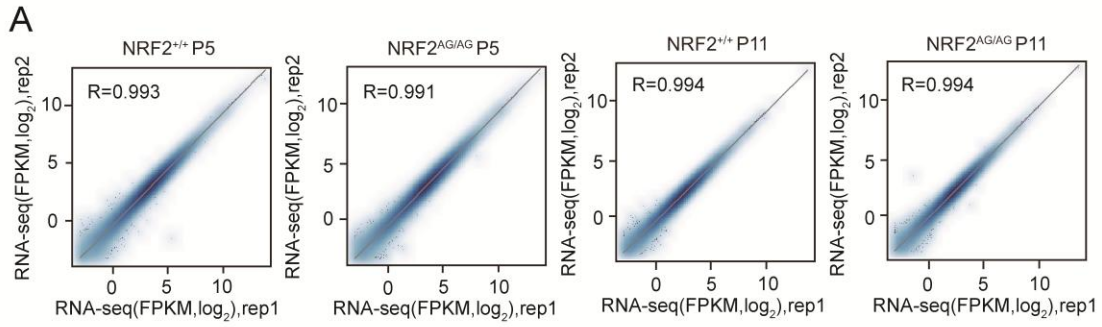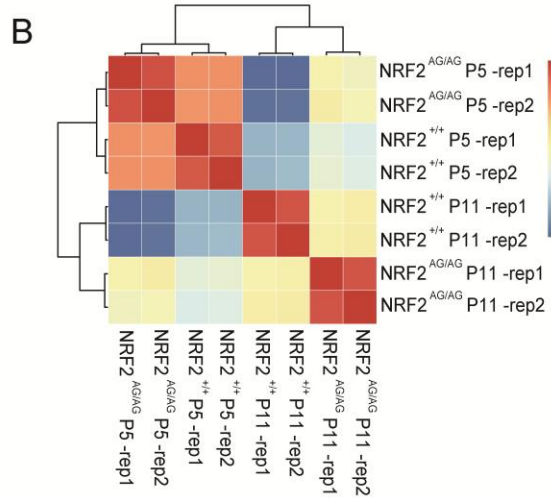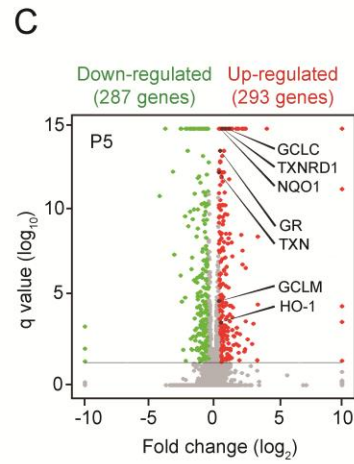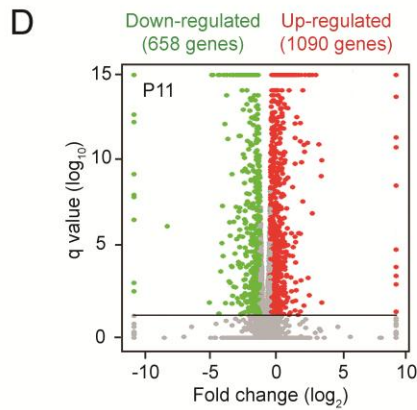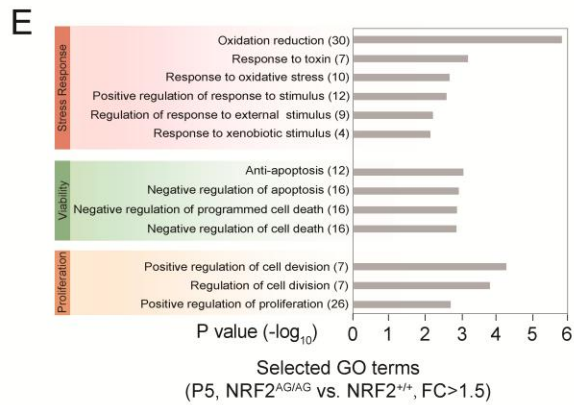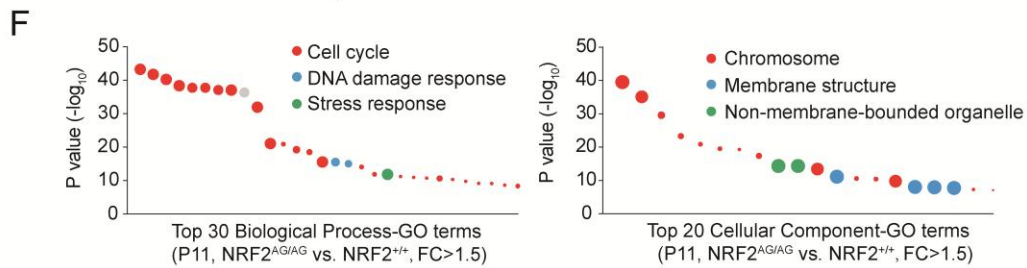

**Supplementary information, Figure S8. Global gene expression analysis of P5 and P11 hMSCs**

(A) Scatter plots showing the correlation of gene expression (FPKM > 0.1) between duplicates of P5 and P11 *NRF2*<sup>+/+</sup> and *NRF2*<sup>AG/AG</sup> hMSCs, respectively. The Spearman correlation coefficient was shown at the left upper side of each panel.

(B) Heatmap showing correlation of gene expression between 8 hMSC samples.

(C) Volcano plot showing differentially expressed genes (*NRF2*<sup>+/+</sup> vs. *NRF2*<sup>AG/AG</sup> <0.67, *NRF2*<sup>+/+</sup> vs. *NRF2*<sup>AG/AG</sup> >1.5, q < 0.05) between *NRF2*<sup>+/+</sup> and *NRF2*<sup>AG/AG</sup> hMSCs at P5. Representative NRF2 target genes were highlighted.

(D) Volcano plot showing differentially expressed genes (*NRF2*<sup>+/+</sup> vs. *NRF2*<sup>AG/AG</sup> <0.67, *NRF2*<sup>+/+</sup> vs. *NRF2*<sup>AG/AG</sup> >1.5, q < 0.05) between *NRF2*<sup>+/+</sup> and *NRF2*<sup>AG/AG</sup> hMSCs at P11.

(E) Selected GO term enrichment for the upregulated genes (*NRF2*<sup>AG/AG</sup> vs. *NRF2*<sup>+/+</sup> >1.5, q < 0.05) in P5 hMSCs, FC: fold change. The number of genes included in each category was shown in brackets after the term name and P (-log<sub>10</sub>) values were indicated by grey columns.

(F) Top 30 biological processes and 20 cellular component GO terms enriched in the up-regulated genes in P11 hMSCs, FC: fold change. The number of genes included in each terms was indicated by the size of point.



A

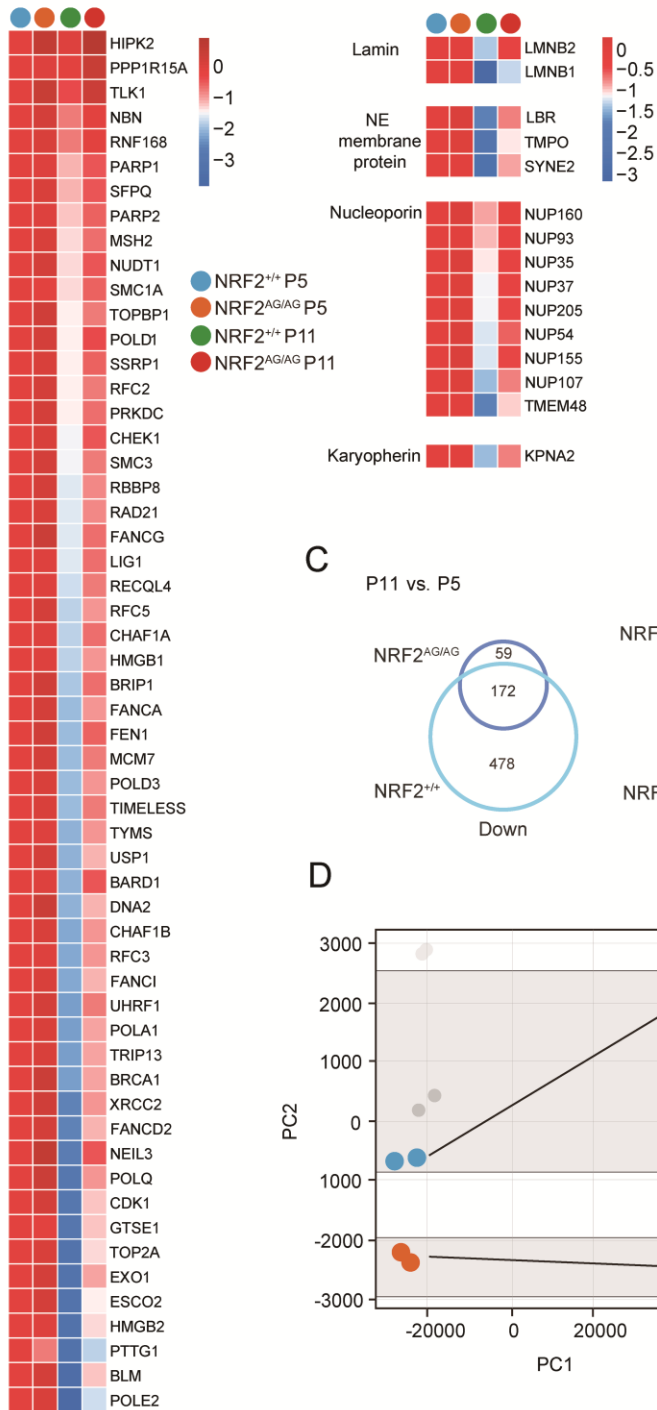

B

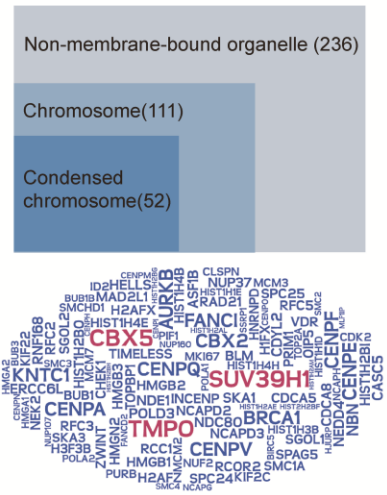

C

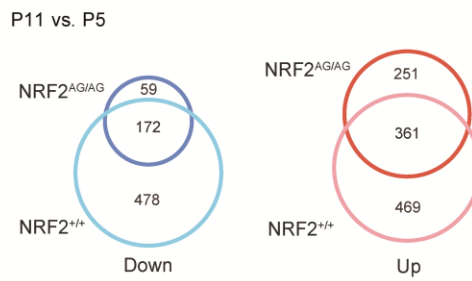

D

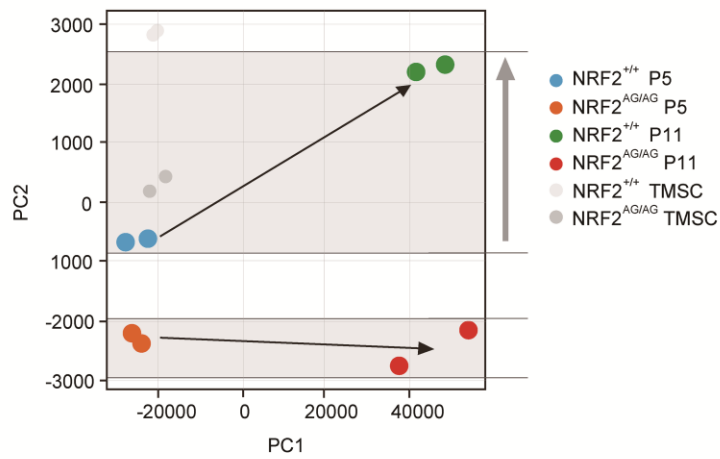

**Supplementary information, Figure S9. A rejuvenated cellular state revealed by gene expression profile of *NRF2*<sup>AG/AG</sup> hMSCs**

(A) Heatmap showing the expression levels of the DNA damage response (left) and nuclear envelope (right) -associated genes were maintained in P11 *NRF2*<sup>AG/AG</sup> hMSCs. All FPKMs of the indicated genes were normalized by the ones in P5 *NRF2*<sup>+/+</sup> group and the relative expression level were presented as Log<sub>2</sub> (Ratio).

(B) Selected chromosome organization-associated GO terms for upregulated genes in P11 hMSCs (*NRF2*<sup>AG/AG</sup> vs. *NRF2*<sup>+/+</sup> >1.5, q < 0.05). The number of genes included in each category was shown in brackets after the term name. Lower word cloud showing all 111 up-regulated chromosome organization-associated genes. Senescence-associated heterochromatin organizers SUV39H1, CBX5 (HP1 $\alpha$ ) and TMPO (LAP2) were highlighted.

(C) Venn diagram showing the numbers of the upregulated genes and downregulated genes during serial passaging (P11 vs. P5) of *NRF2*<sup>+/+</sup> and *NRF2*<sup>AG/AG</sup> hMSCs. In *NRF2*<sup>+/+</sup> hMSCs, the altered genes were identified as “signatures of replicative senescence”, which included 650 down-regulated genes and 831 up-regulated genes (FC >2 or FC <0.5). In comparison, less pronounced transcriptional changes were observed in *NRF2*<sup>AG/AG</sup> hMSCs, with only 231 down-regulated genes and 613 up-regulated genes.

(D) Principal component analysis (PCA) of RNA-Seq data of P5 and P11 *NRF2*<sup>+/+</sup> and *NRF2*<sup>AG/AG</sup> hMSCs using genes with FPKM > 0.1.

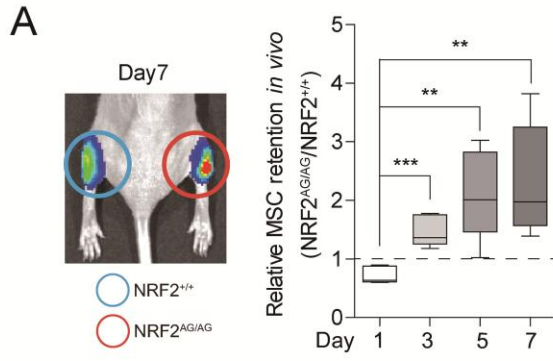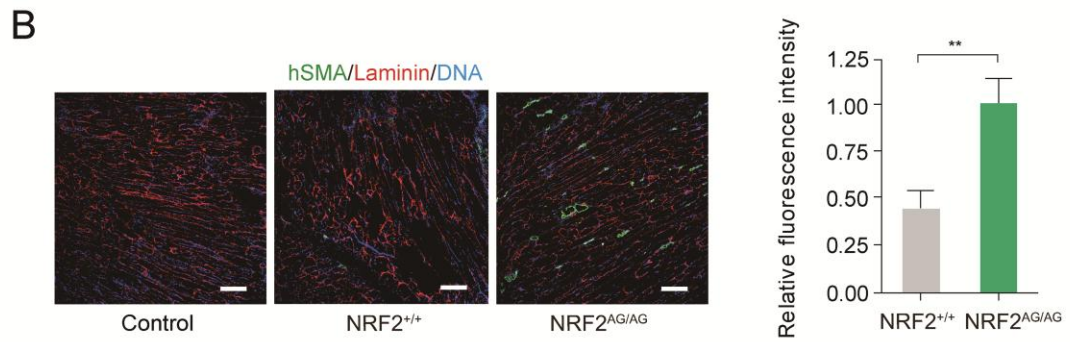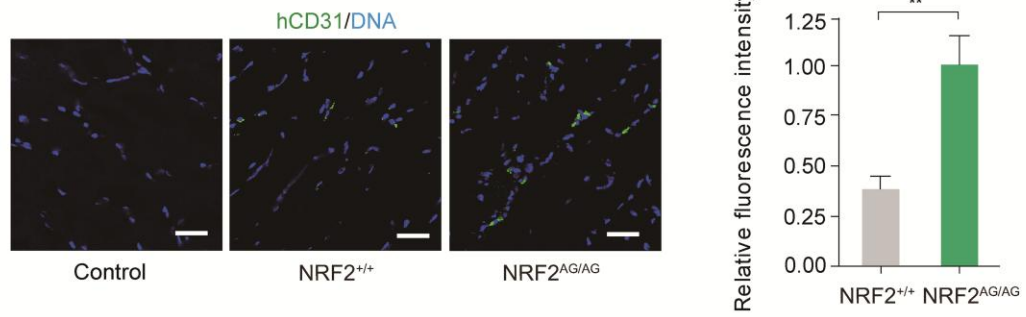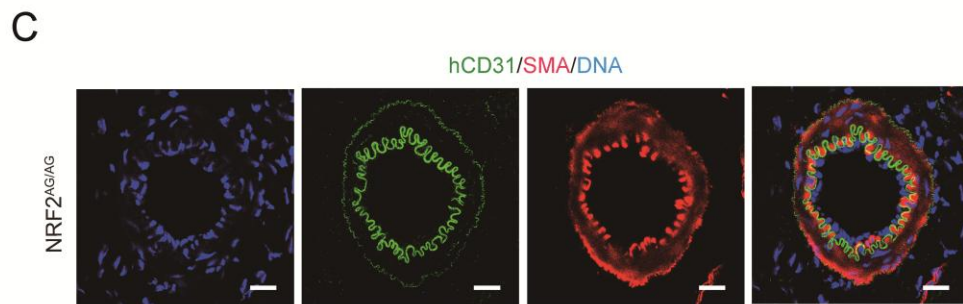

**Supplementary information, Figure S10. *In vivo* survival and conversion of transplanted hMSCs to vascular-related cells in a mouse hindlimb ischemia model**

(A) Photon flux from TA muscle of nude mice transplanted with luciferase-labeled *NRF2*<sup>+/+</sup> (left) and *NRF2*<sup>AG/AG</sup> (right) hMSCs (P8). Data were presented as relative luminescent signals (*NRF2*<sup>AG/AG</sup> vs. *NRF2*<sup>+/+</sup>) and plot was presented as Whiskers (Min to Max), n=5, \*\*P < 0.01, \*\*\*P < 0.001.

(B) Representative immunofluorescence images showing the presence of hCD31 and hSMA-positive human cells in the muscle tissue of hindlimb ischemic mice 4 weeks after hMSC transplantation. Scale bar, 200  $\mu$ m (hSMA) and 50  $\mu$ m (hCD31), respectively. Mean fluorescence intensity from 6 images were determined by ImageJ. Data were normalized to the *NRF2*<sup>AG/AG</sup> hMSC group and presented as mean  $\pm$  SEM, n = 6, \*\*P < 0.01.

(C) Representative immunofluorescence images showing neovascularization in ischemic hindlimb receiving *NRF2*<sup>AG/AG</sup> hMSCs. Scale bar, 20  $\mu$ m.

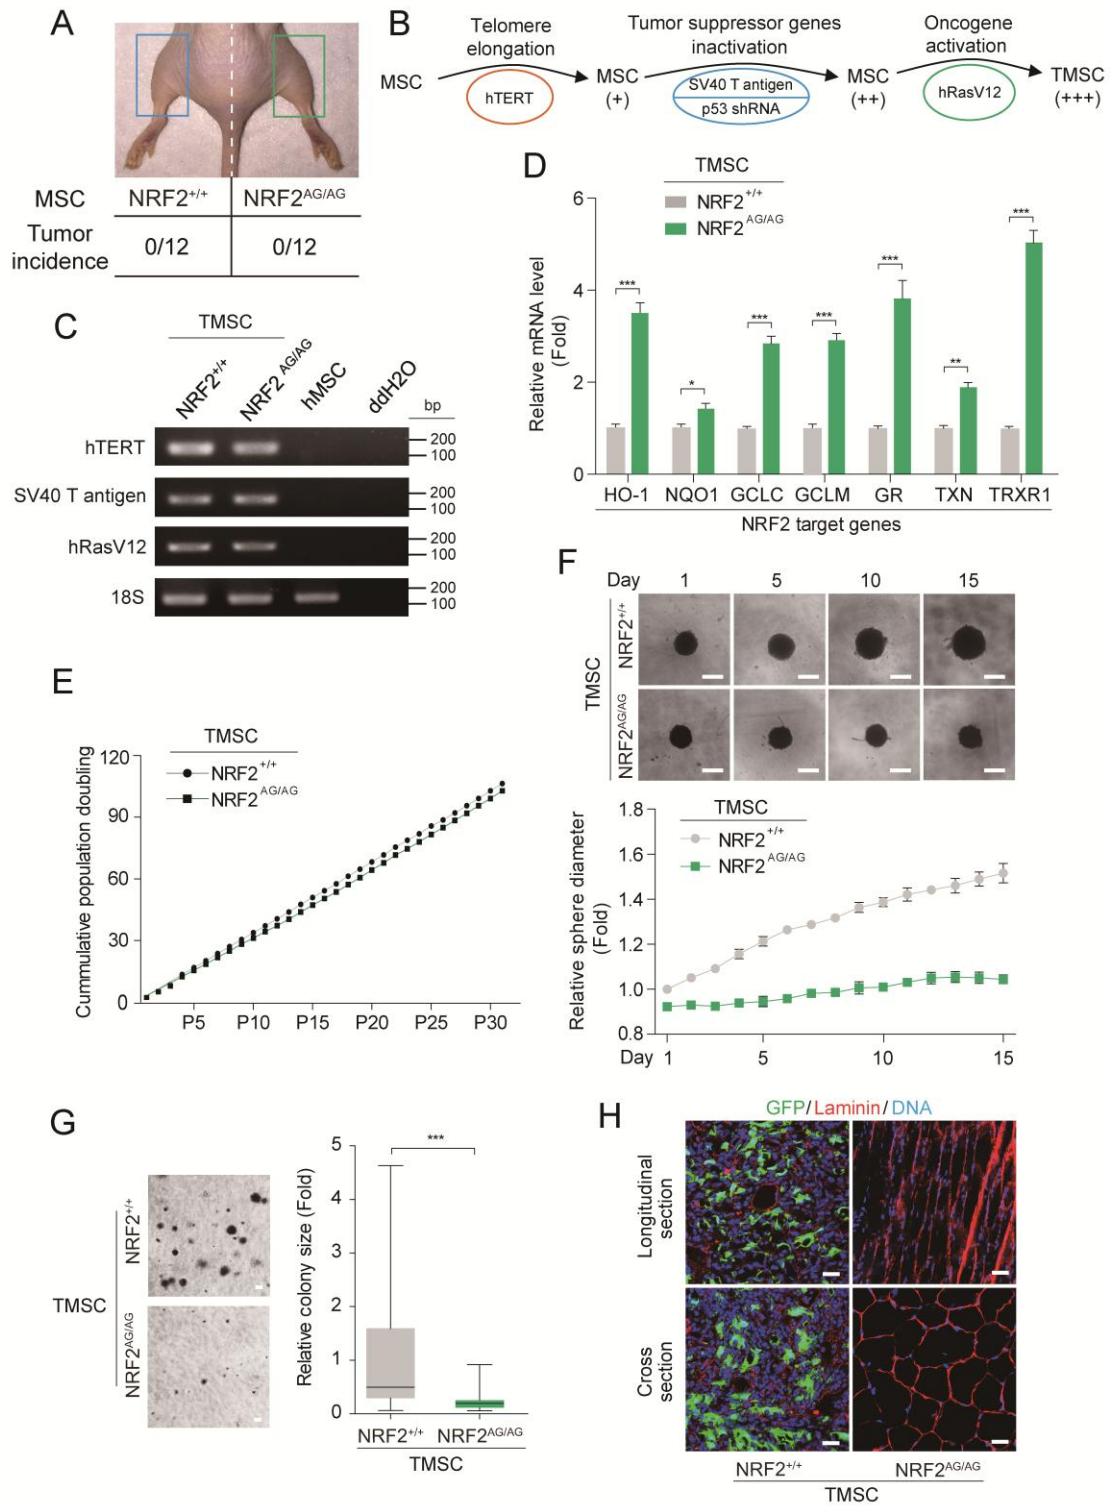

**Supplementary information, Figure S11. *NRF2*<sup>AG/AG</sup> hMSCs display resistance to oncogenes-induced neoplastic transformation**

(A) A representative image showing long-term *in vivo* consequences after hMSCs (P5) transplantation. Images and tumor incidence were obtained 6 months after transplantation.

(B) Schematic representation of transforming hMSCs into TMSCs via an *in vitro* oncogenic transformation procedure. This *in vitro* transformation system encompasses different sequential molecular events, which include elongation of telomeres, perturbation of the tumor suppressors p53 and pRb, as well as overexpression of oncogenic Ras<sup>G12V</sup> protein.

(C) RT-PCR analysis of the indicated oncogenic transformation factors showing these factors were expressed at comparable levels in *NRF2*<sup>+/+</sup> and *NRF2*<sup>AG/AG</sup> TMSCs. Untransformed WT hMSCs were used as a negative control.

(D) RT-qPCR analysis confirmed that the NRF2 pathway was constitutively activated in *NRF2*<sup>AG/AG</sup> TMSCs. Data were presented as mean ± SEM, n = 3, \*P < 0.05, \*\*P < 0.01, \*\*\*P < 0.001.

(E) Growth curve showing the accumulative population doubling of *NRF2*<sup>+/+</sup> and *NRF2*<sup>AG/AG</sup> TMSCs. Both *NRF2*<sup>+/+</sup> and *NRF2*<sup>AG/AG</sup> TMSCs could be passaged over 30 times when cultured as monolayer cells.

(F-G) The *in vitro* anchorage-independent growth assay. (F) Spontaneous formed spheres consisting of *NRF2*<sup>AG/AG</sup> TMSCs grew significantly slower than *NRF2*<sup>+/+</sup> TMSCs on low-attached plates. Scale bar, 1 mm. Diameter data were shown as the average value of horizontal and vertical diameters which were measured by ImageJ. The value of *NRF2*<sup>+/+</sup> group at day 1 was normalized to 1. Data were presented as mean ± SEM, n=10. (G) Colonies formed from *NRF2*<sup>AG/AG</sup> TMSCs in soft agarose were much smaller and fewer compared with the WT group. Scale bar, 50 μm. Relative colony size data were presented as mean ± SD, n >100 colonies, \*\*\*P < 0.001.

(H) Representative fluorescence images of *NRF2*<sup>+/+</sup> and *NRF2*<sup>AG/AG</sup> TMSC-injected legs 10 weeks after implantation. *NRF2*<sup>+/+</sup> TMSCs gave rise to sarcomas-like tumors that exhibited no boundary between tumor and surrounding muscle tissue. In sharp contrast, legs implanted with *NRF2*<sup>AG/AG</sup> TMSCs exhibited normal muscle-fiber patterns and no human cells were detected. Human cells were identified by GFP, muscle fibers were visualized by Laminin staining. Scale bar, 50 μm.

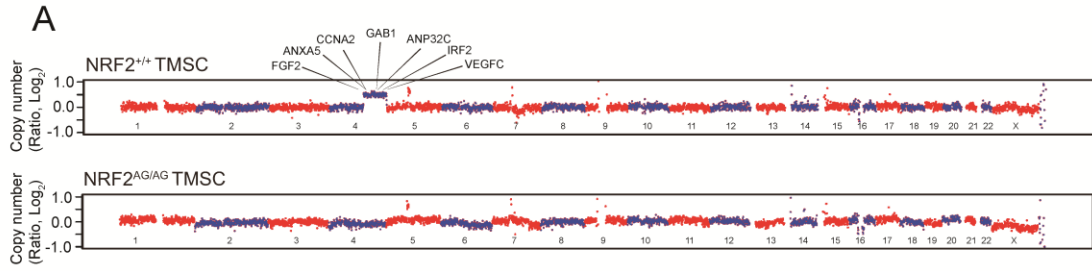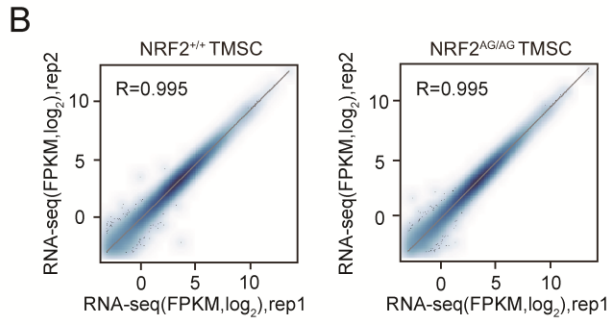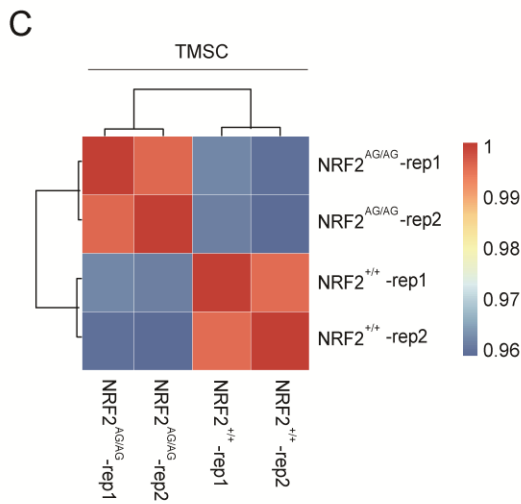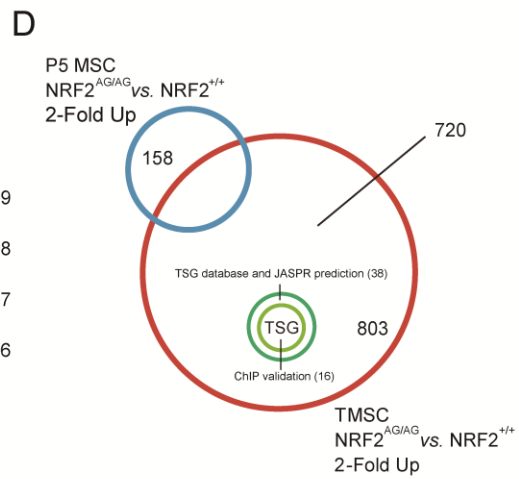

**Supplementary information, Figure S12. Genomic and transcriptomic differences between *NRF2*<sup>+/+</sup> and *NRF2*<sup>AG/AG</sup> TMSCs**

(A) Whole genome analysis of copy number variations (CNVs) in *NRF2*<sup>+/+</sup> and *NRF2*<sup>AG/AG</sup> TMSCs at P13 by deep sequencing. Tumor-promoting genes in the gain region of chromosome 4 were indicated.

(B) Scatter plots showing the correlation of gene expression (FPKM > 0.1) between duplicates of *NRF2*<sup>+/+</sup> and *NRF2*<sup>AG/AG</sup> TMSCs, respectively. The Spearman correlation coefficient was shown at the left upper side of each panel.

(C) Heatmap showing correlation of gene expression between 4 TMSC samples.

(D) Venn diagram showing that 158 genes were upregulated in P5 MSCs and 803 genes were upregulated in TMSCs after NRF2 gene editing. Among the 720 genes induced by constitutively activated NRF2 specifically in TMSCs, 38 of them were tumor suppressor genes (TSGs) containing predicted NRF2 binding sites and 16 of 38 genes were identified as NRF2-responsive TSGs in TMSCs by ChIP-qPCR.



**A**

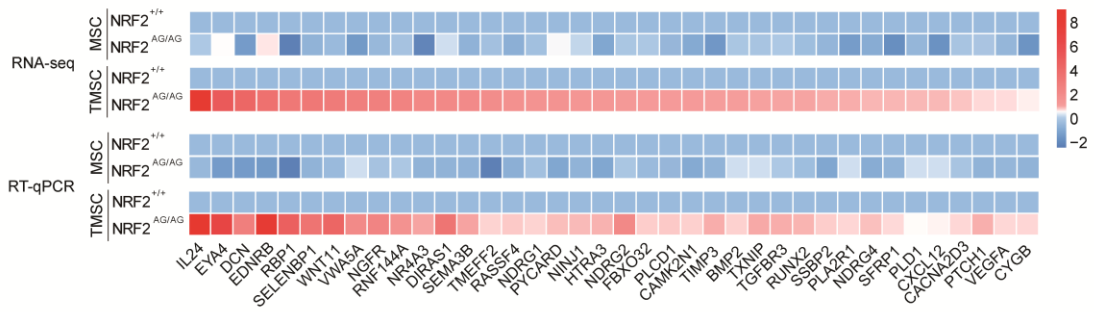

**B**

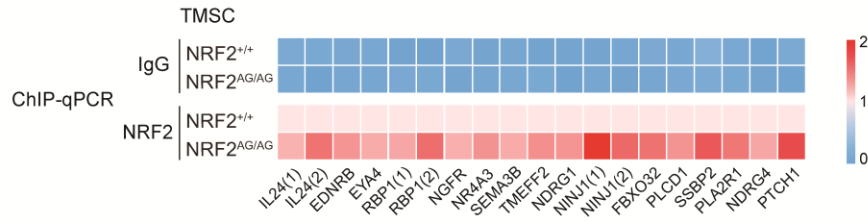

**C**

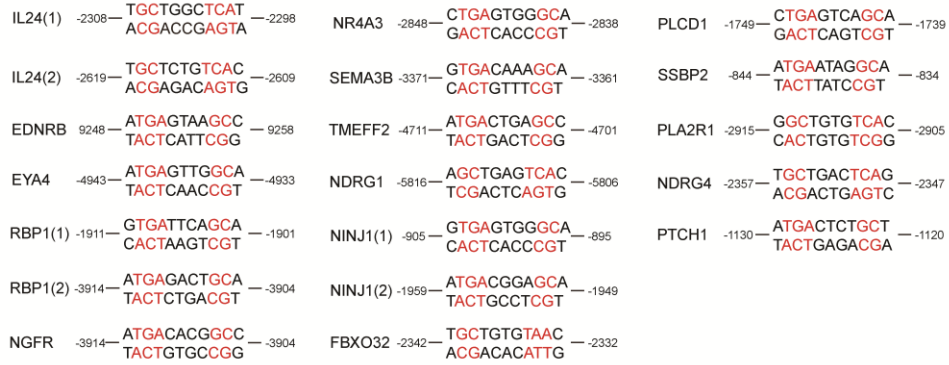

**Supplementary information, Figure S13. Identification of putative NRF2-responsive TSGs in TMSCs**

(A) RNA-seq and RT-qPCR heatmap showing upregulation of 38 predicted NRF2-responsive TSGs in TMSCs ( $NRF2^{AG/AG}$  vs.  $NRF2^{+/+}$ ), not in hMSCs ( $NRF2^{AG/AG}$  vs.  $NRF2^{+/+}$ ). All FPKMs and RT-qPCR values of the indicated genes were normalized by the ones in  $NRF2^{+/+}$  group and the relative expression level were presented as  $\text{Log}_2(\text{Ratio})$ .

(B) Heatmap of ChIP-qPCR showing 16/38 putative TSGs containing NRF2 binding motifs in TMSCs. Enrichment values were normalized to input and presented as the ratio relative to NRF2 antibody-incubated  $NRF2^{+/+}$  group.

(C) The identified NRF2 binding sites (nTGAnnnnGCn) and their relative distance from transcription start site (TSS) of the 16 putative NRF2-responsive TSGs.

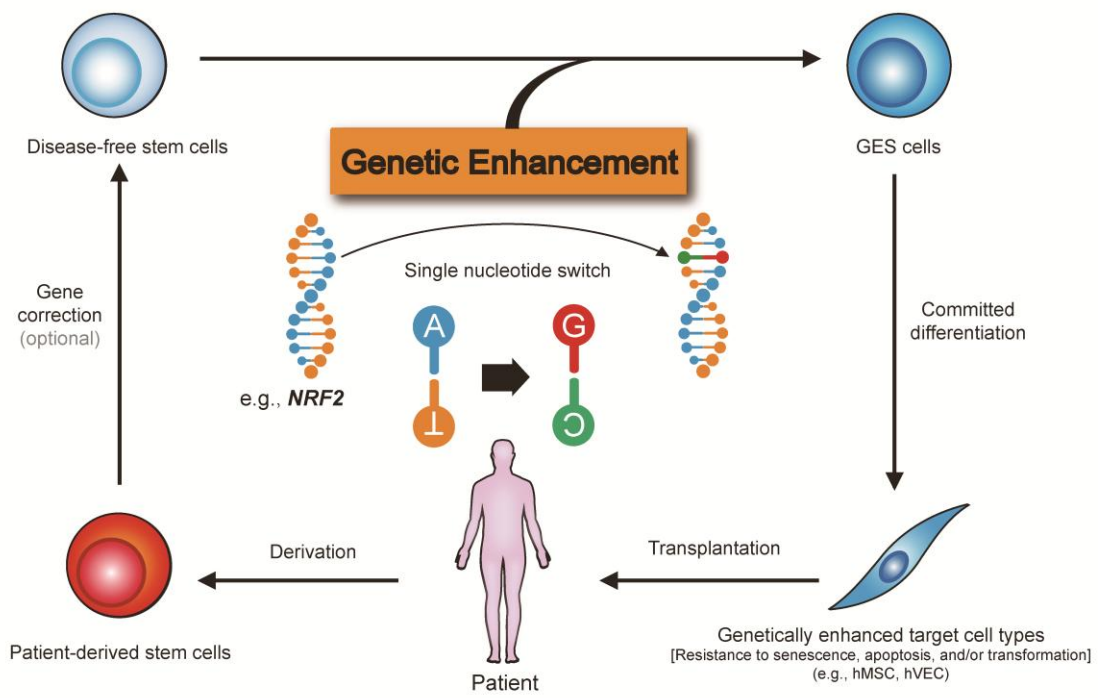

**Supplementary information, Figure S14. Schematic diagram showing the application of genetic enhancement to generate superior and safer materials for cell replacement therapy**

Patient-derived stem cells (with optional gene correction if the pathogenic mutation is known) could be subjected to a genetic enhancement procedure. For instance, replacement of a single nucleotide in *NRF2* gene locus via targeted gene editing to genetically enhance endogenous NRF2 pathway. The generated genetically enhanced stem (GES) cells could be differentiated to high quality target cell types with more robust generative capacity and reduced tendency to tumorigenesis for cell replacement therapy.
